# Supplementary material for: High performance adsorbents based on hierarchically porous silica for purifying multicomponent wastewater
Source: Royal Society of Chemistry journal article supplement (doi:10.1039/c1jm12142a), 2011-01-01
Supplement: c1jm12142a.pdf [file c1jm12142a.pdf]

## Electronic Supplementary Information (ESI)

# High Performance Adsorbents Based on Hierarchically Porous Silica for Purifying Multicomponent Wastewater

Wenping Shi, Shengyang Tao\*, Yongxian Yu, Yuchao Wang and Wei Ma

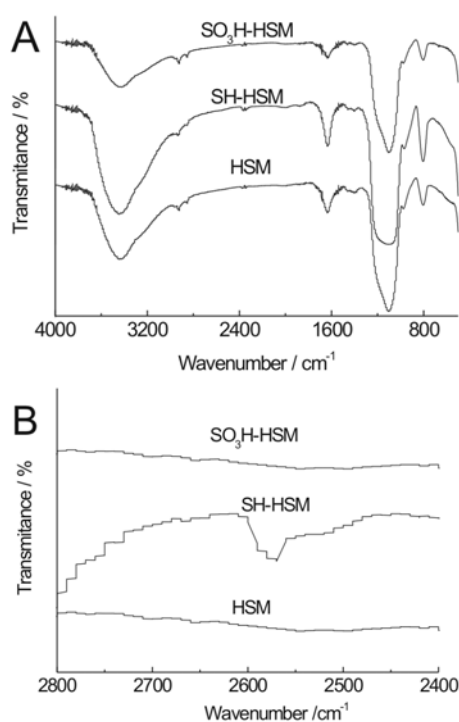

Fig. S1 FT-IR of HSM, SH-HSM and SO<sub>3</sub>H-HSM

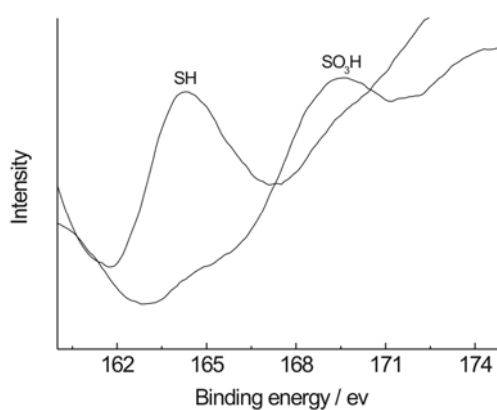

Fig. S2 XPS of SH-HSM and SO<sub>3</sub>H-HSM

Table S1 comparison of the adsorption capability for pollutants (50 mg L<sup>-1</sup>) on the unmodified and modified material

| adsorption capability/mg g <sup>-1</sup><br>material | fuchsin basic | Hg <sup>2+</sup> | imidacloprid | alanine | tyramine |
|------------------------------------------------------|---------------|------------------|--------------|---------|----------|
| HSM                                                  | 8.33          | 0.85             | 1.78         | 1.58    | 1.02     |
| SH-HSM                                               |               | 137.34           |              |         |          |
| SO <sub>3</sub> H-HSM                                | 128.55        |                  | 80.50        | 42.36   | 148.40   |
